# Supplementary material for: Active Patient Participation in the Development of an Online Intervention
Source: PubMed Central journal article supplement (PMC4259996; doi:10.2196/resprot.3695), 2014-11-06
Supplement: resprot_v3i4e59_app2.pdf [file resprot_v3i4e59_app2.pdf]

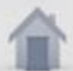

Home

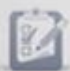

Vragenlijst

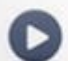

Mijn video's

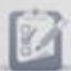

Actielijst

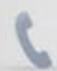

Help

Mijn agenda

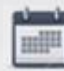

Video dagboek Emma

< terug naar overzicht dagboeken

Maak kennis met Emma

Terugblik van Emma

Voor een consult

Emoties tijdens een consult

Vragen stellen

Alle vragen gesteld krijgen

Complexe informatie

Informatie delen met de arts

Behoeftte aan ondersteuning

Verschillende informatiebronnen

Onvrede

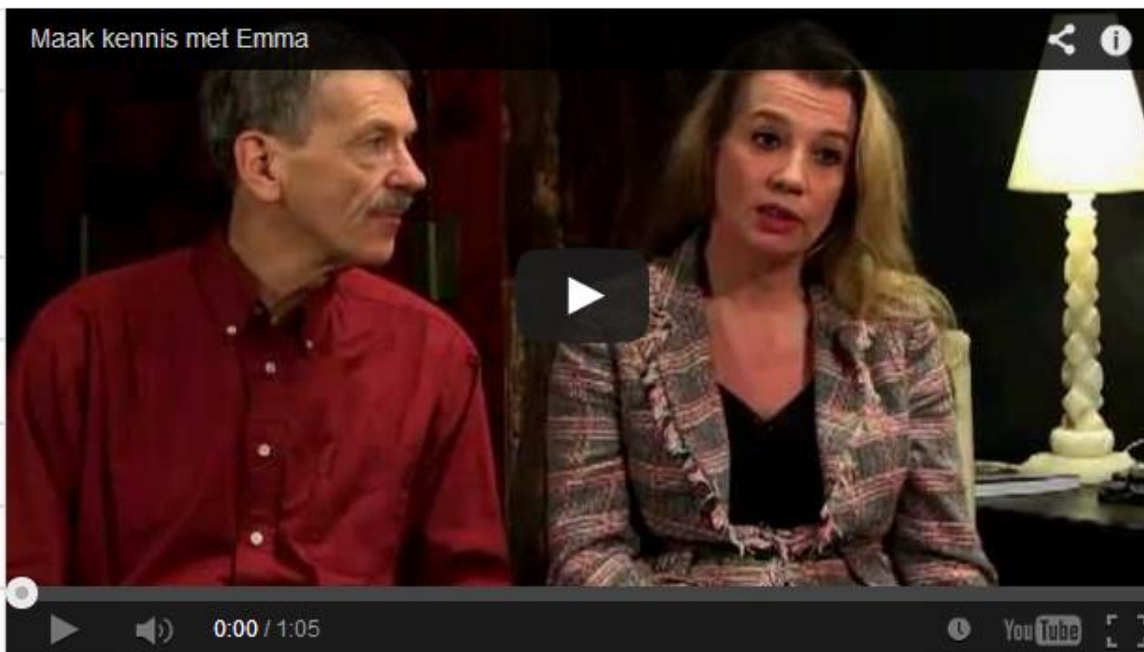

type hier uw notities voor uw actielijst

Voeg toe aan actielijst
